# Supplementary material for: Electroluminescence and fluorescence response towards acid vapors depending on the structures of indole-fused phospholes
Source: Royal Society of Chemistry journal article supplement (doi:10.1039/c5ra19867d), 2015-01-01
Supplement: c5ra19867d1.pdf [file c5ra19867d1.pdf]

**Supporting Information for:**

**Electroluminescence and Fluorescence Response  
towards Acid Vapors Depending on the Structures of  
Indole-fused Phospholes**

Peng Gong<sup>a</sup>, Kaiqi Ye<sup>a,\*</sup>, Jingbo Sun<sup>a</sup>, Peng Chen<sup>b</sup>, Pengchong Xue<sup>a</sup>, Hao Yang<sup>a</sup> and  
Ran Lu<sup>a,\*</sup>

<sup>a</sup> State Key Laboratory of Supramolecular Structure and Materials, College of Chemistry, Jilin  
University, Changchun 130012, P. R. China

<sup>b</sup> Key Laboratory of Functional Inorganic Material Chemistry (MOE), School of Chemistry and  
Materials Science, Heilong-jiang University, No. 74, Xuefu Road, Nangang District, Harbin, P. R.  
China

E-mail: luran@mail.jlu.edu.cn

**Table S1** Photophysical data of **2-DIPO** and **3-DIPO**.

| Compound      | Solution <sup>a</sup>                    |                                            |                            |                                | Solid <sup>c</sup>         |                   |
|---------------|------------------------------------------|--------------------------------------------|----------------------------|--------------------------------|----------------------------|-------------------|
|               | $\lambda_{\text{max}}^{\text{abs}}$ (nm) | E (L·mol <sup>-1</sup> ·cm <sup>-1</sup> ) | $\lambda_{\text{em}}$ (nm) | $\Phi_{\text{F}}$ <sup>b</sup> | $\lambda_{\text{em}}$ (nm) | $\Phi_{\text{F}}$ |
| <b>2-DIPO</b> | 261, 279,                                | 4×10 <sup>4</sup> , 2.2×10 <sup>4</sup>    |                            |                                |                            |                   |
|               | 316, 331,                                | 1.3×10 <sup>4</sup> , 1×10 <sup>4</sup> ,  | 494                        | 0.70                           | 530                        | 0.53              |
|               | 409                                      | 1.2×10 <sup>4</sup>                        |                            |                                |                            |                   |
| <b>3-DIPO</b> | 265, 317,                                | 3.5×10 <sup>3</sup> , 7.6×10 <sup>2</sup>  | 548                        | 0.02                           | 574                        | 0.13              |
|               | 430                                      | 11                                         |                            |                                |                            |                   |

<sup>a</sup> in THF (5  $\mu$ M); <sup>b</sup> Using 9,10-diphenylanthracene in benzene ( $\Phi_{\text{F}}$  = 85 %) as the standard; <sup>c</sup> solid state.

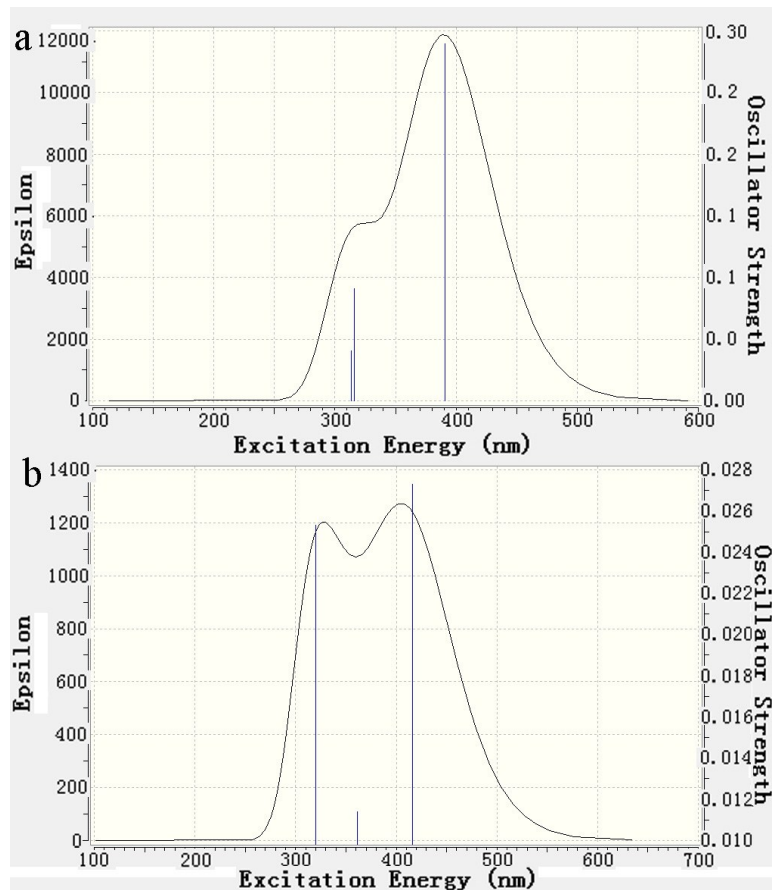

**Figure S1** UV-vis absorption spectra of **2-DIPO** (a) and **3-DIPO** (b) based on TD-DFT calculation.

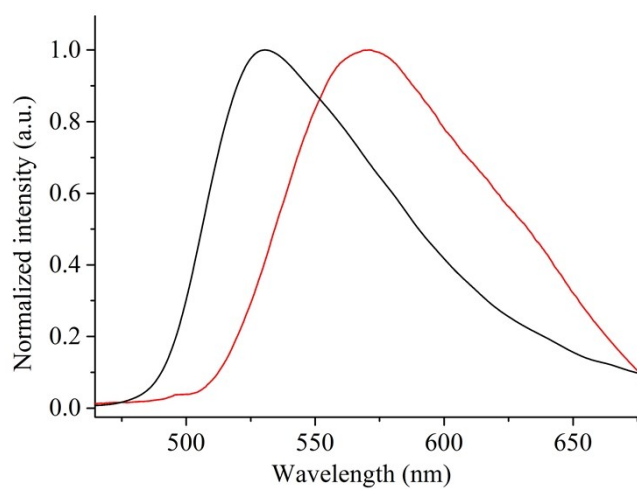

**Figure S2** Normalized fluorescence emission spectra of **2-DIPO** (black) and **3-DIPO** (red) in solid states ( $\lambda_{\text{ex}} = 410$  nm).

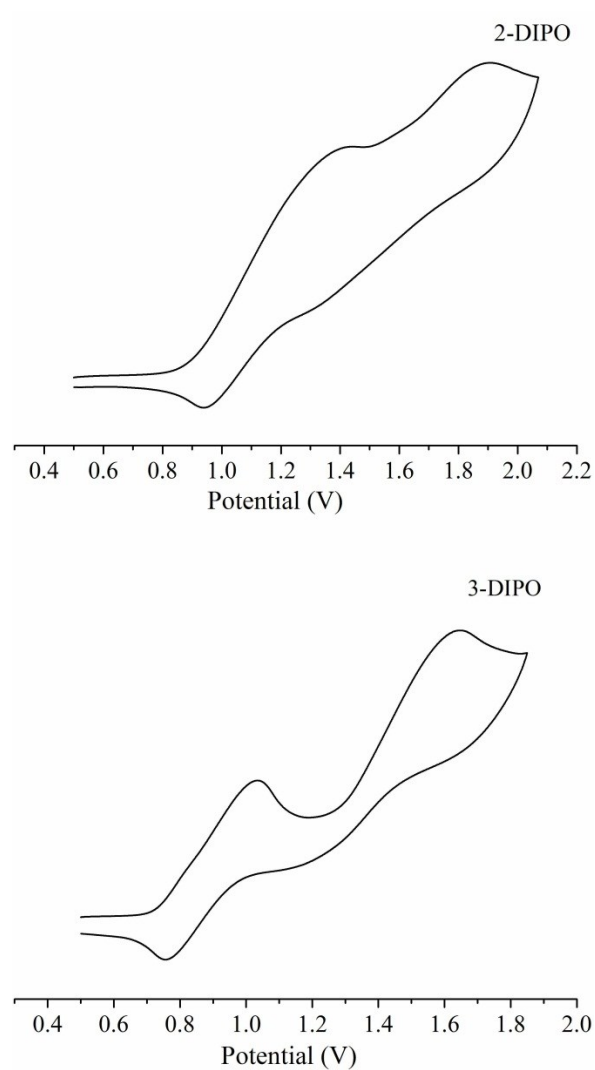

**Figure S3** Cyclic voltammetry diagrams of **2-DIPO** and **3-DIPO** in anhydrous  $\text{CH}_2\text{Cl}_2$  with 0.1 M  $\text{Bu}_4\text{NBF}_4$  as electrolyte at a scan rate of  $50 \text{ mV} \cdot \text{s}^{-1}$ .

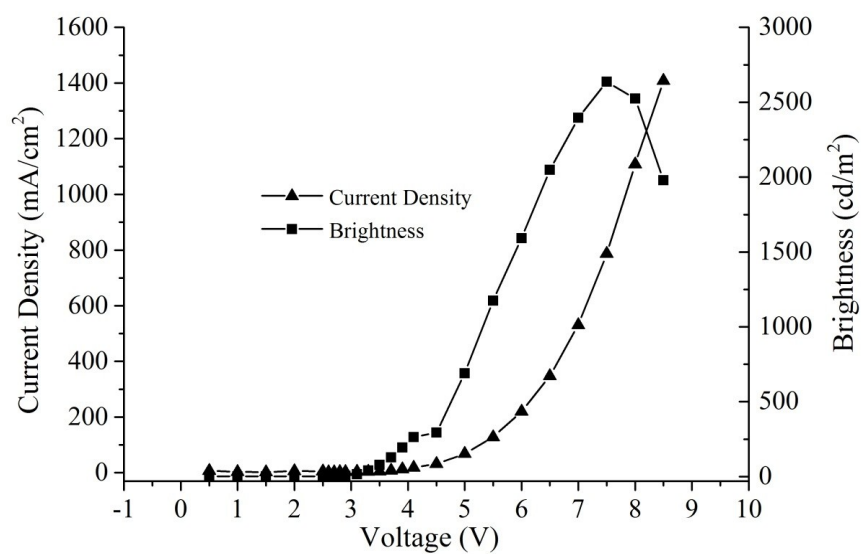

**Figure S4** J–V–L characteristics of device A.

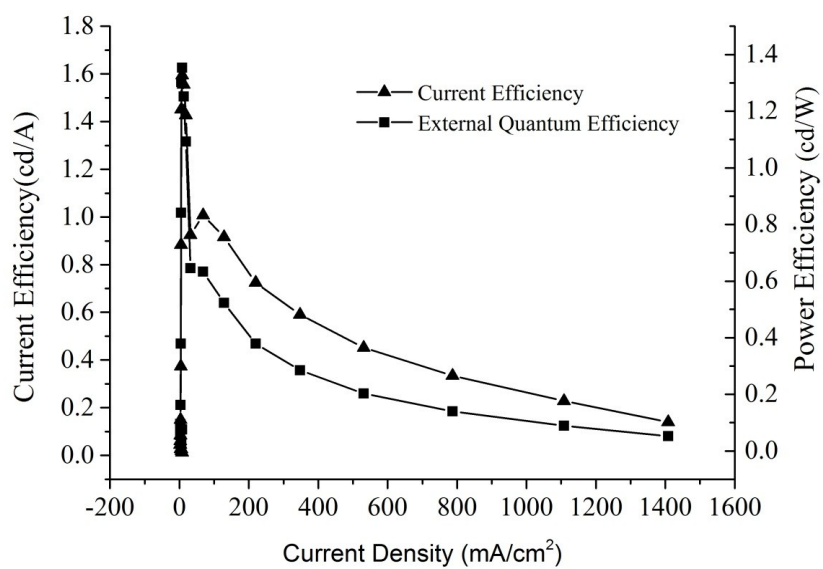

**Figure S5** Current efficiency and power efficiency–current density of device A.

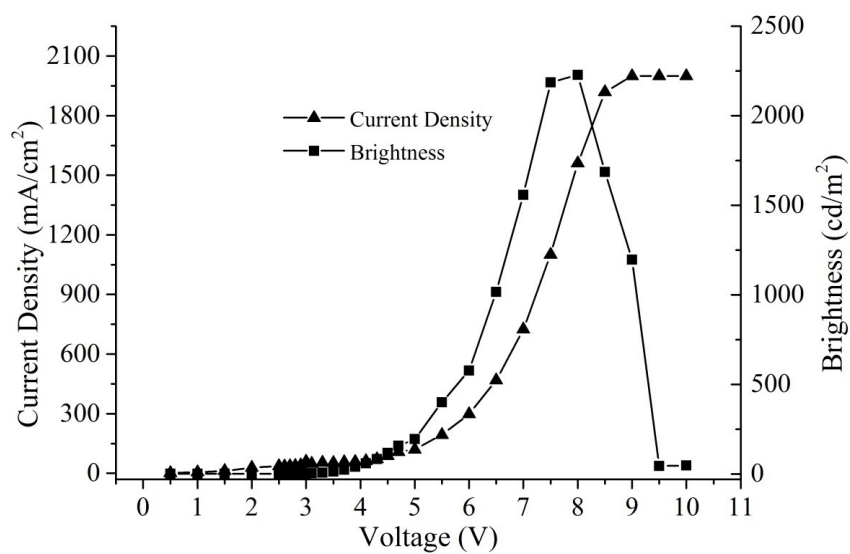

**Figure S6** J–V–L characteristics of device B.

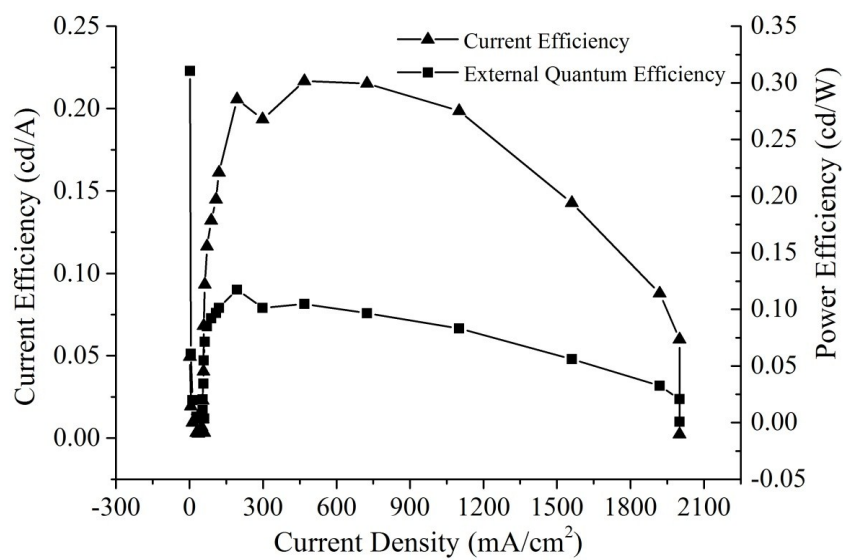

**Figure S7** Current efficiency and power efficiency–current density of device B.

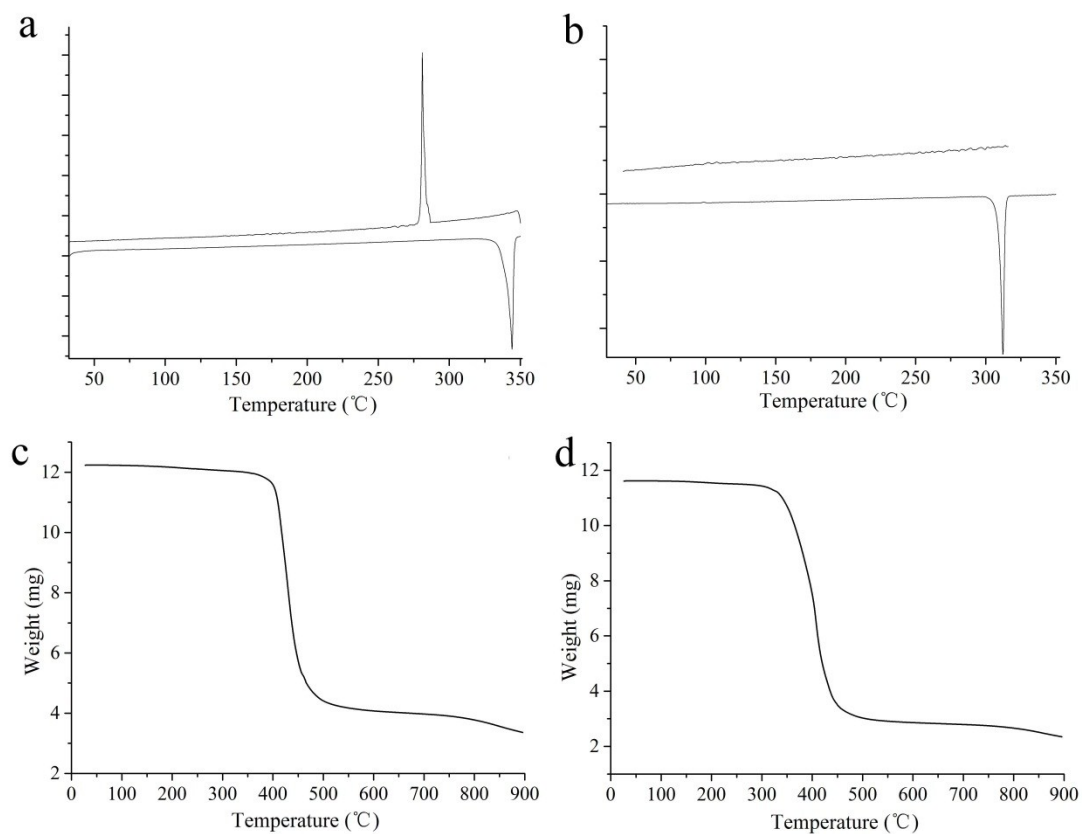

**Figure S8** DSC thermograms of **2-DIPO** (a) and **3-DIPO** (b); TGA thermograms of **2-DIPO** (c) and **3-DIPO** (d) under a nitrogen atmosphere at a heating/cooling rate of  $10\text{ }^{\circ}\text{C min}^{-1}$ .

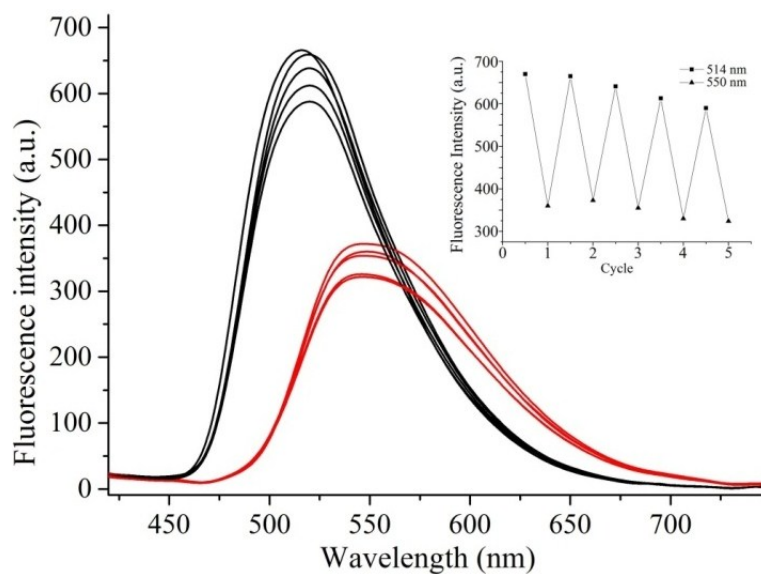

**Figure S9** The fluorescence spectral changes of **2-DIPO** in filter paper strip upon exposed to HCl (red) and NH<sub>3</sub> vapors (black). Inset: the reversibility in the sensory processes ( $\lambda_{\text{ex}} = 365$  nm).

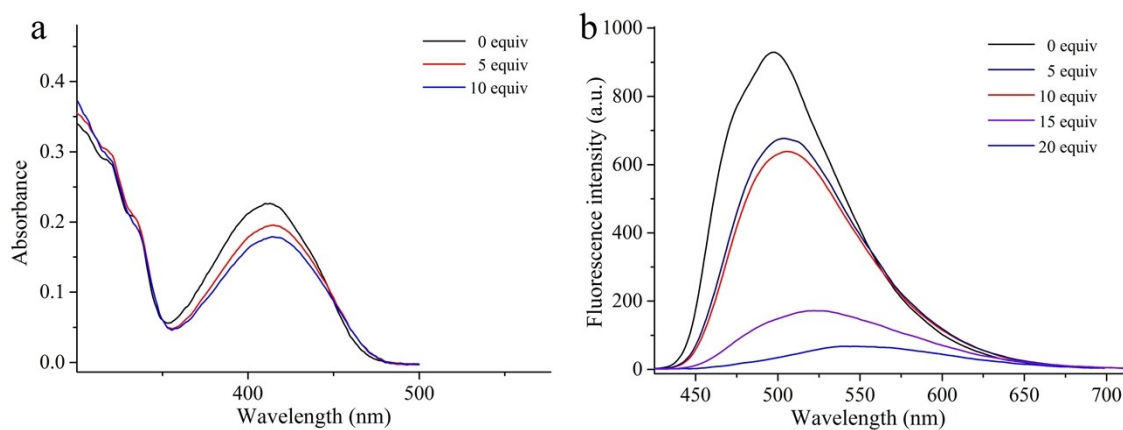

**Figure S10** UV-vis absorption (a) and fluorescence emission (b,  $\lambda_{\text{ex}} = 390$  nm) spectra of **2-DIPO** in toluene ( $5.0 \times 10^{-6}$  M) upon the addition of different amount of trifluoromethanesulfonic acid.



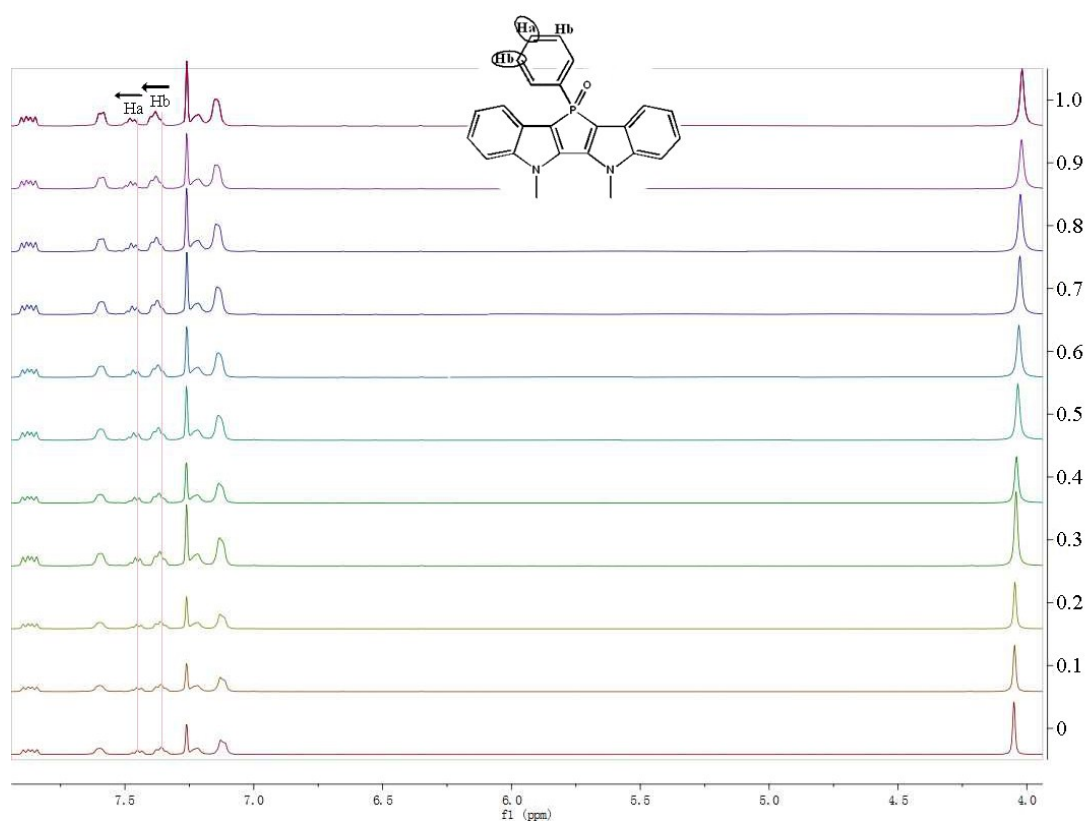

**Figure S11**  $^1\text{H}$  NMR spectra (400 MHz) of **2-DIPO** in  $\text{CDCl}_3$  upon the addition of different amount of trifluoroacetic acid (from 0.1 equiv. to 1.0 equiv.).

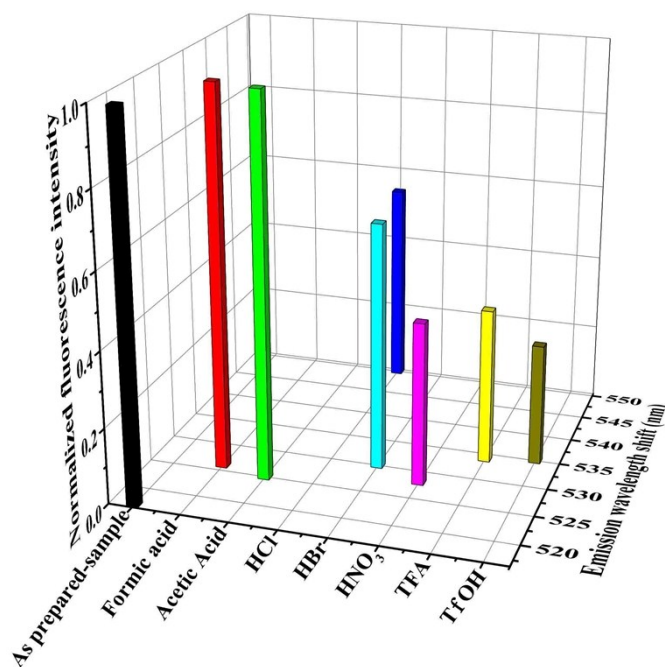

**Figure S12** The emission intensity at maximal emission wavelength of **2-DIPO** in test paper upon exposed to different acid vapors ( $\lambda_{\text{ex}} = 365 \text{ nm}$ ).

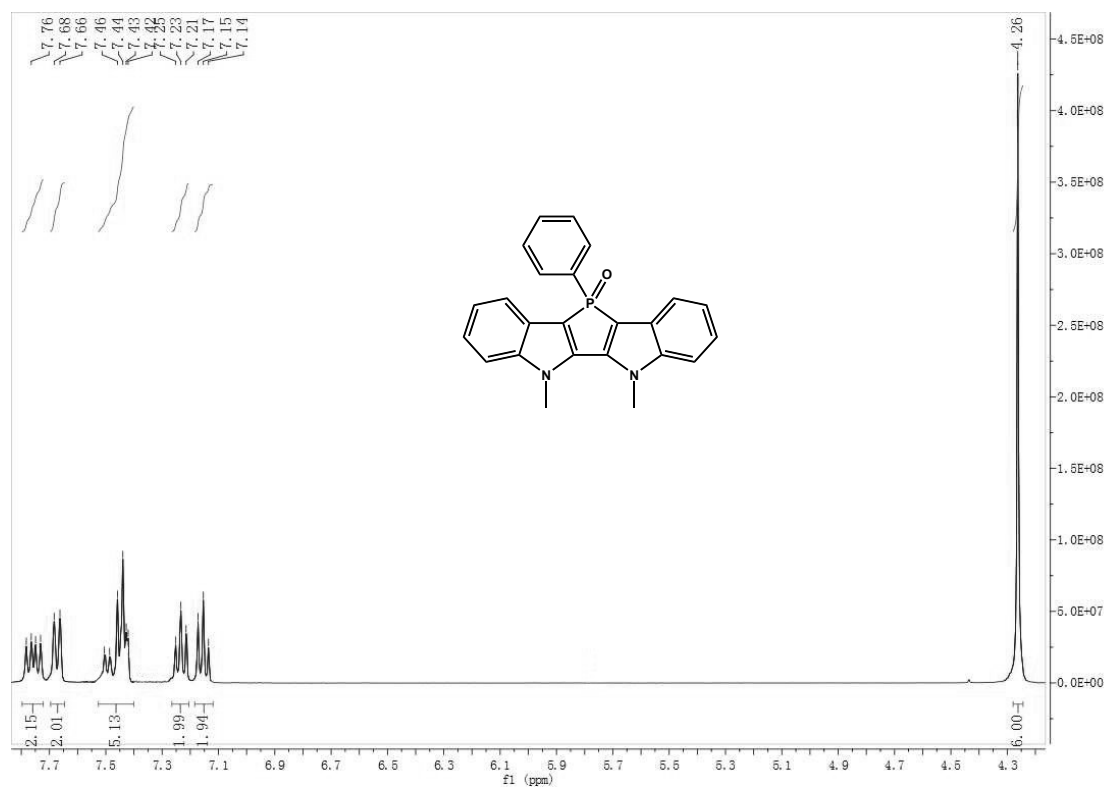

**Figure S13** <sup>1</sup>H NMR (400 MHz, DMSO-d<sub>6</sub>) spectrum of **2-DIPO**.

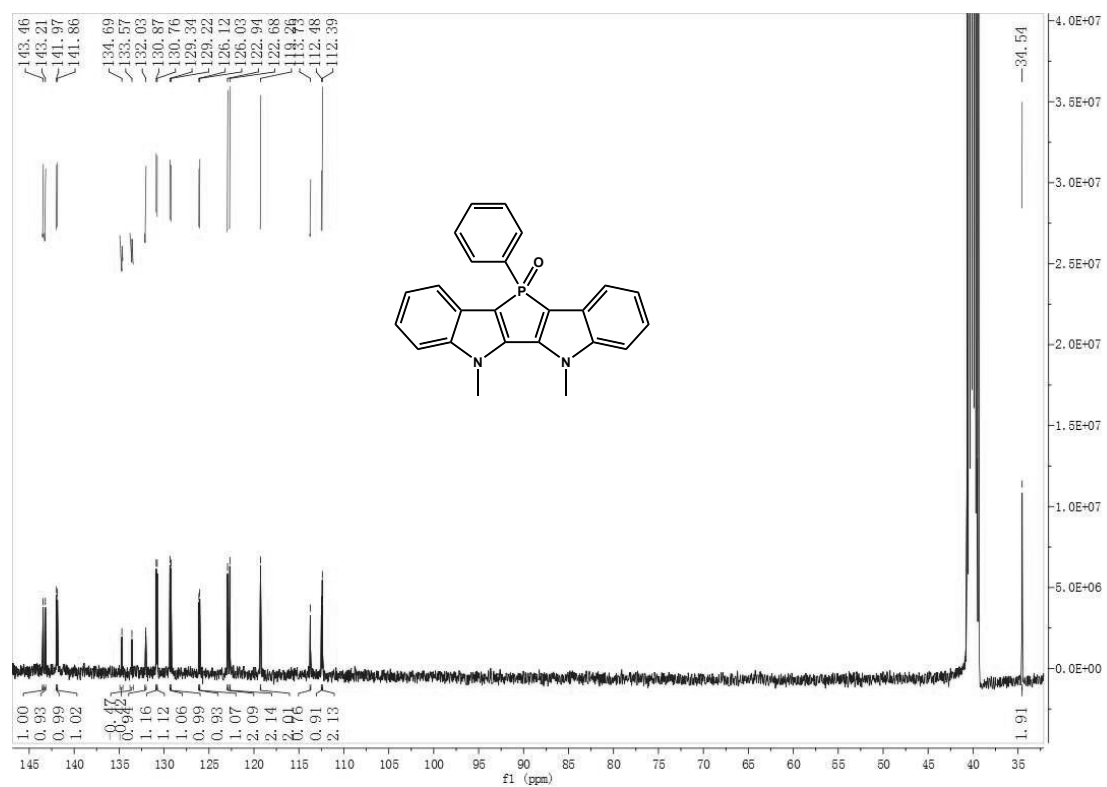

**Figure S14** Quantitative <sup>13</sup>C NMR (100 MHz, DMSO-d<sub>6</sub>) spectrum of **2-DIPO**.

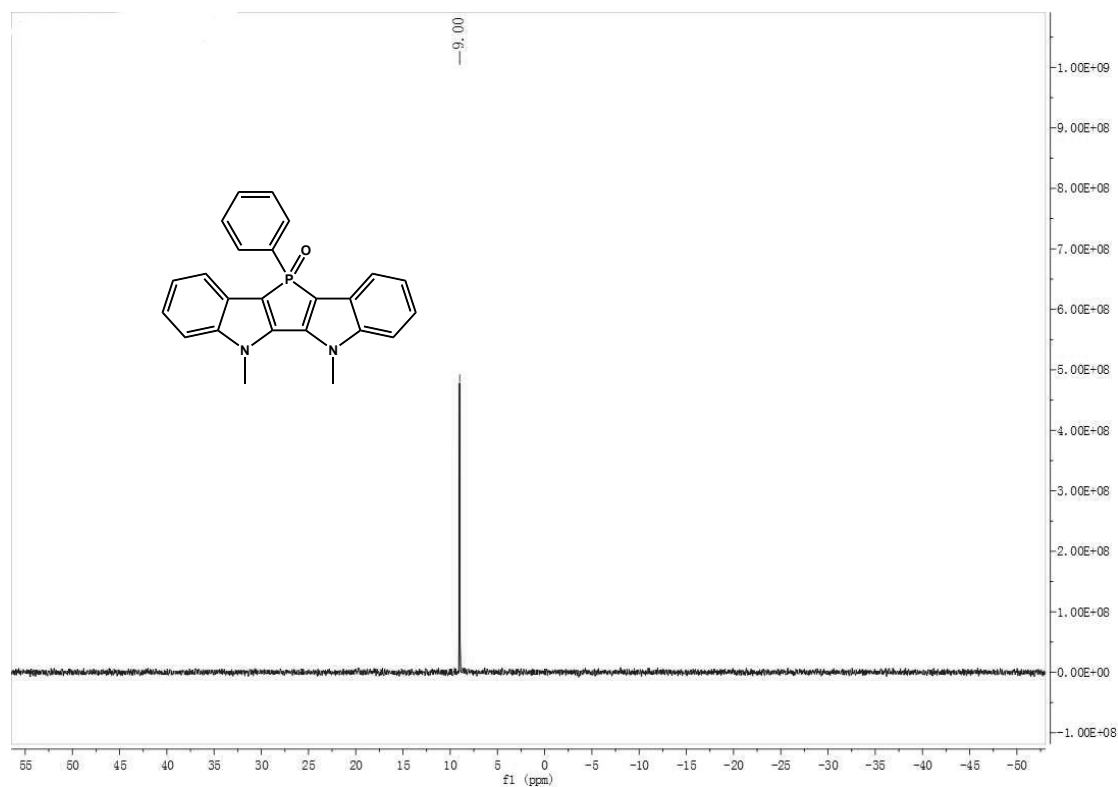

**Figure S15**  $^{31}\text{P}$  NMR (162 MHz,  $\text{DMSO-d}_6$ ) spectrum of **2-DIPO**.

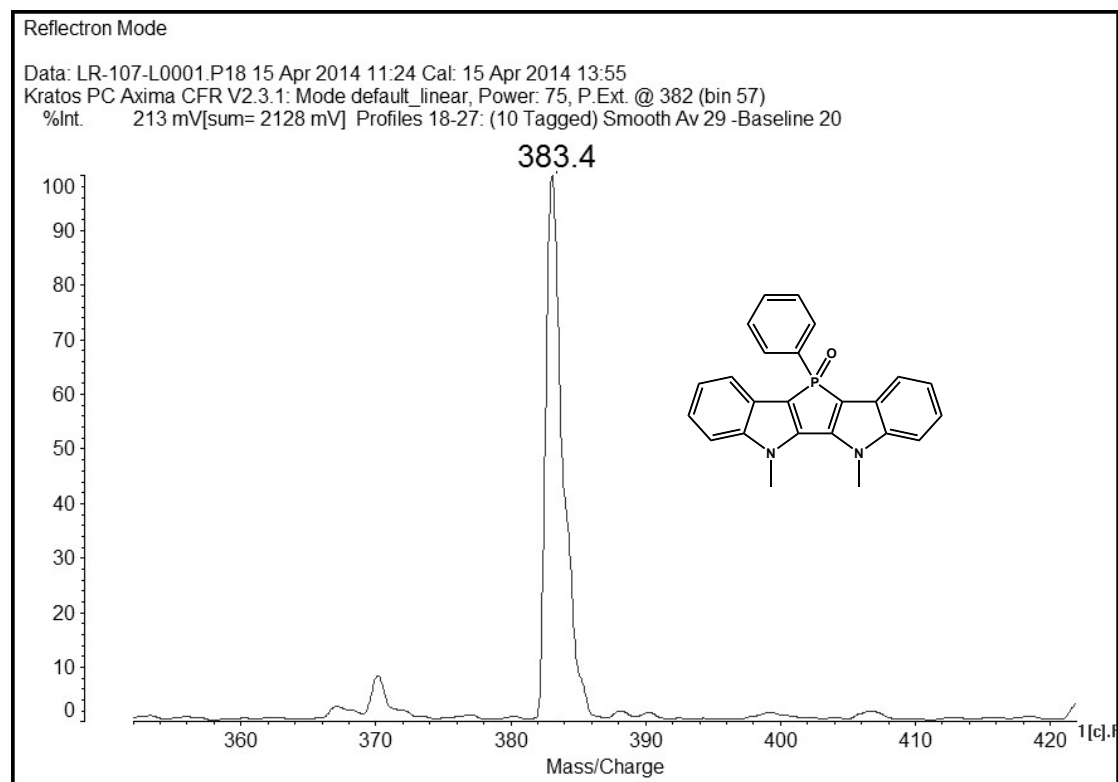

**Figure S16** MALDI/TOF MS spectrum of **2-DIPO**.

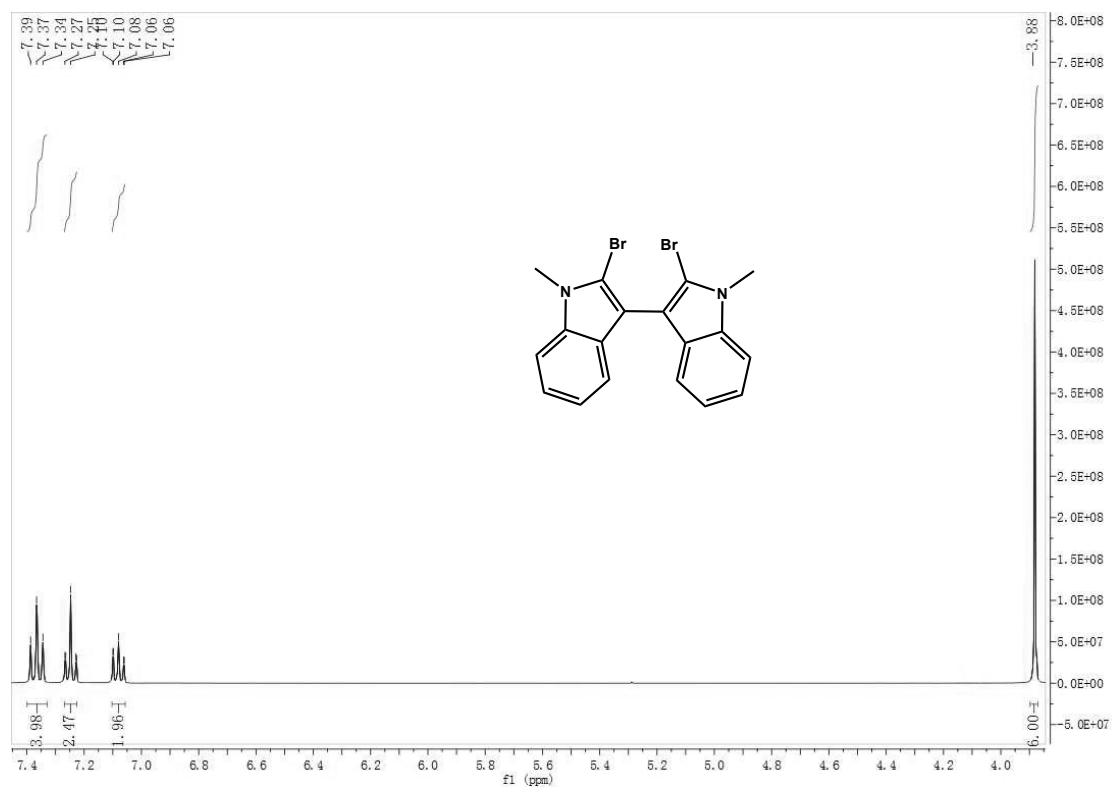

**Figure S17** <sup>1</sup>H NMR (400 MHz, CDCl<sub>3</sub>) spectrum of **3**.

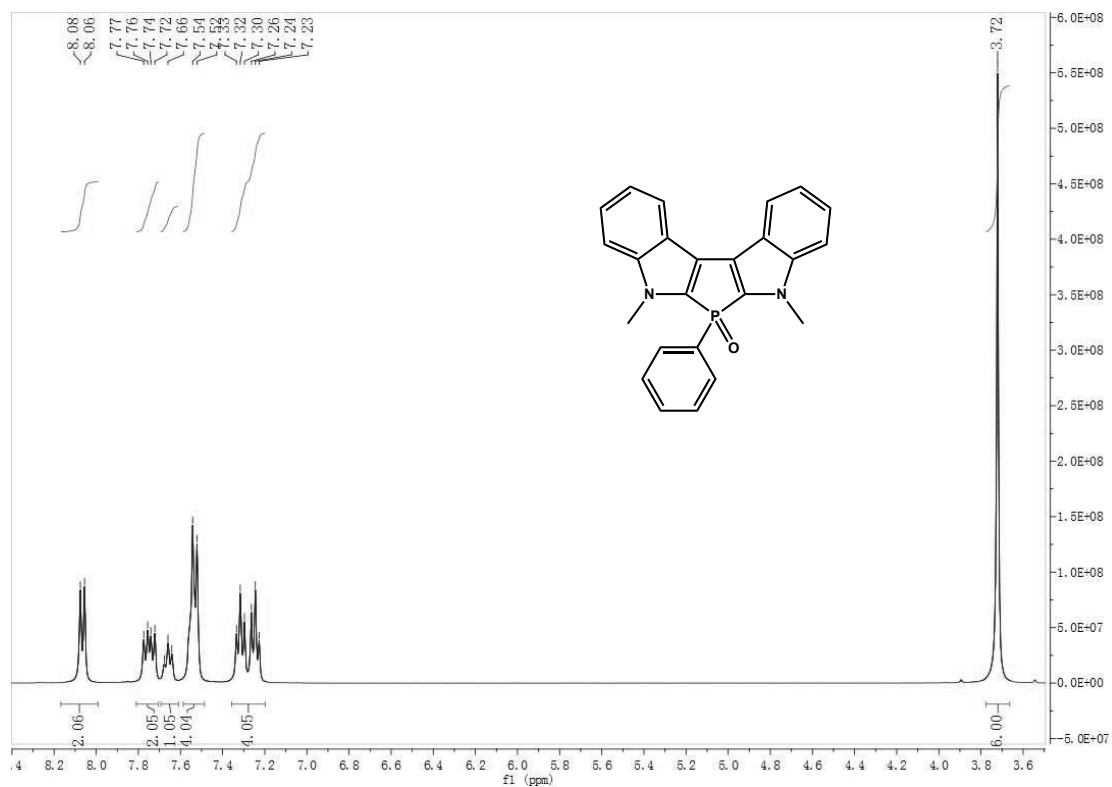

**Figure S18** <sup>1</sup>H NMR (400 MHz, DMSO-d<sub>6</sub>) spectrum of **3-DIPO**.

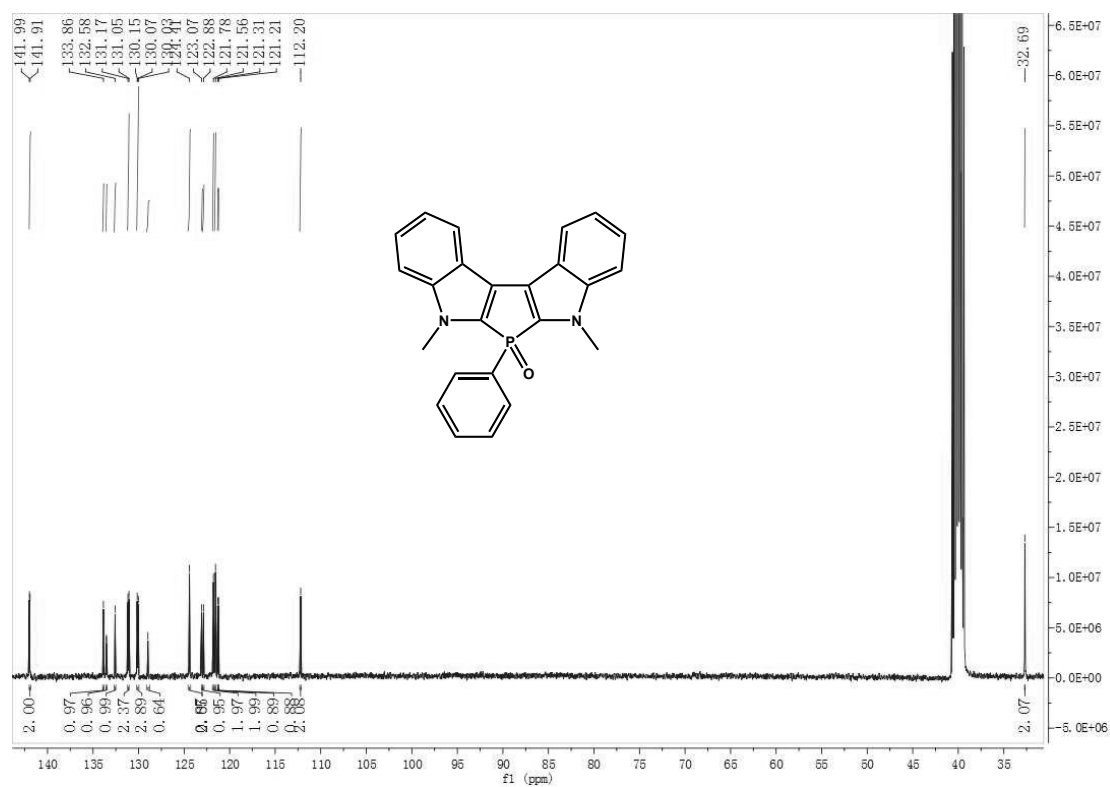

**Figure S19** Quantitative <sup>13</sup>C NMR (100 MHz, DMSO-d<sub>6</sub>) spectrum of **3-DIPO**.

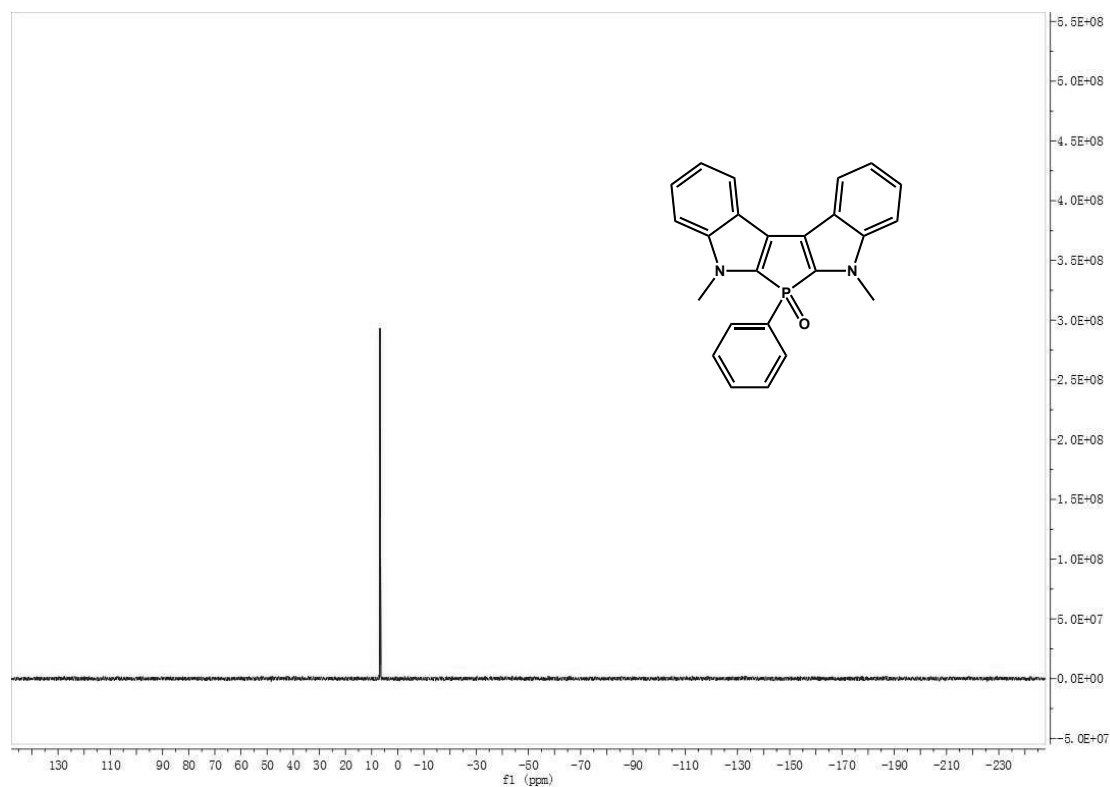

**Figure S20** <sup>31</sup>P NMR (162 MHz, DMSO-d<sub>6</sub>) spectrum of **3-DIPO**.

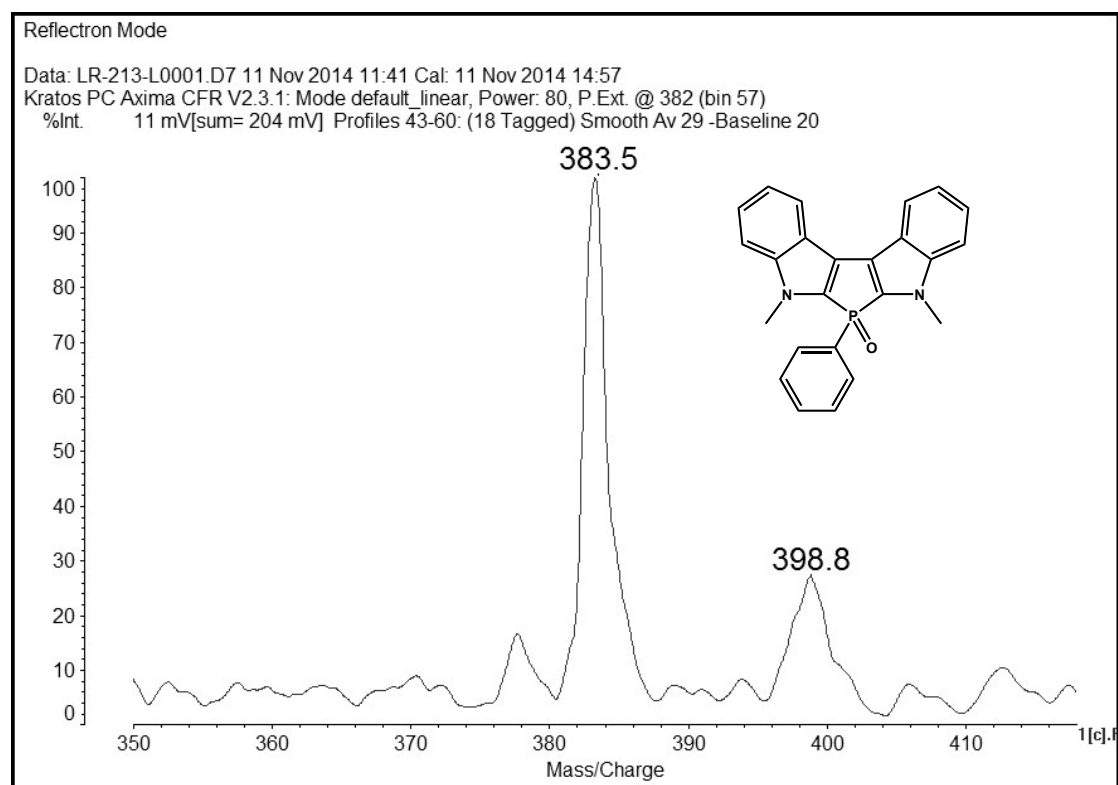

**Figure S21** MALDI/TOF MS spectrum of **3-DIPO**.
